# Supplementary material for: Are volcanic melts less viscous than we thought? The case of Stromboli basalt
Source: Springer Nature journal article supplement (doi:10.1007/s00410-023-02024-w), 2023-06-26
Supplement: MOESM1 [file 410_2023_2024_MOESM1_ESM.xlsx]

## Sheet: Stromboli viscosity calculator
	A	Tg,d (K)	m	b	c	d	Tg,H2O (K)
Fitting parameters for Stromboli basalts	-2.93	940.1	40.7	0.2351	1.234	-1.47	136
									Constants
Temperature in ℃	T	1150							7.635e-07
Temperature in K	T	1423.15			Fixed				-5.209e-05
					Input				0.002282
Water content (wt%)	H2O	3.67			Result				-0.09059
Water content (mol%)	H2O	11.9196							3.552
Coefficients used to calculate glass transition temperature	w1	0.365325
	w2	0.634675
Calculated glass transition temperature (℃)	Tg	429.316
Calculated glass transition temperature (K)	Tg	702.466
Calculated logarithm of viscosity (η in Pa s)	log η	0.144882
